# Supplementary material
Source: PubMed Central journal article supplement (PMC3760218)
Supplement: NIHMS496806-supplement-001.pdf [file NIHMS496806-supplement-001.pdf]

*Supporting Information for*

DNA Mismatch Synthesis Complexes Provide Insights  
into Base Selectivity of a B family DNA Polymerase

Shuangluo Xia, Jimin Wang & William H. Konigsberg\*

Table S1. Crystallographic Statistics for Data Collection and Structure Refinement of dNTP/dT-Containing Ternary Complexes of qm RB69pol.

|                                 | dATP/dT                                       | dGTP/dT                                       | dCTP/dT                                       | dTTP/dT                                       |
|---------------------------------|-----------------------------------------------|-----------------------------------------------|-----------------------------------------------|-----------------------------------------------|
| <b>Space group</b>              | P2 <sub>1</sub> 2 <sub>1</sub> 2 <sub>1</sub> |
| Unit cell (a,b,c (Å))           | 75.1,120.2,130.8                              | 75.1,119.5,130.1                              | 75.0,120.1,130.9                              | 75.1,119.8,130.4                              |
| Resolution (Å)                  | 50.0 - 2.05                                   | 50.0 - 1.90                                   | 50.0 - 2.19                                   | 50.0 - 1.97                                   |
| <b>No of unique reflections</b> | 74,061                                        | 91,587                                        | 60,668                                        | 83,285                                        |
| Redundancy                      | 3.6 (3.7)                                     | 3.2 (3.0)                                     | 3.1 (2.8)                                     | 3.9 (3.7)                                     |
| Completeness (%)                | 98.5 (99.5)                                   | 98.8 (96.7)                                   | 98.4 (96.9)                                   | 99.0 (98.6)                                   |
| R <sub>merge</sub> (%)          | 10.8 (68.0)                                   | 7.9 (82.2)                                    | 12.0 (77.7)                                   | 10.2 (94.9)                                   |
| I / σ                           | 10.6 (1.6)                                    | 13.9 (1.1)                                    | 7.6 (1.0)                                     | 11.5 (1.3)                                    |
| <b>Final model</b>              |                                               |                                               |                                               |                                               |
| Amino acid residues             | 903                                           | 903                                           | 903                                           | 903                                           |
| Water molecules                 | 754                                           | 545                                           | 346                                           | 691                                           |
| Ca <sup>2+</sup> ions           | 5                                             | 5                                             | 5                                             | 5                                             |
| Template nucleotides            | 18                                            | 18                                            | 18                                            | 18                                            |
| Primer nucleotides              | 13                                            | 13                                            | 13                                            | 13                                            |
| dNTP                            | 1                                             | 1                                             | 1                                             | 1                                             |
| <b>Refinement Statistics</b>    |                                               |                                               |                                               |                                               |
| Reflections                     | 70,263                                        | 86,970                                        | 57,254                                        | 79,070                                        |
| R (%)                           | 18.4 (24.1)                                   | 18.1 (27.6)                                   | 19.5 (26.7)                                   | 19.0 (26.6)                                   |
| R <sub>free</sub> (%)           | 23.7 (27.0)                                   | 21.3 (30.1)                                   | 25.1 (32.0)                                   | 23.4 (28.6)                                   |
| r.m.s.d                         |                                               |                                               |                                               |                                               |
| Bond length (Å)                 | 0.006                                         | 0.006                                         | 0.009                                         | 0.007                                         |
| Bond angles (°)                 | 1.056                                         | 1.111                                         | 1.167                                         | 1.156                                         |
| PDB code                        | 4FJ5                                          | 4FJ7                                          | 4FJ8                                          | 4FJ9                                          |

Footnotes:

a, Statistics for the highest resolution shell are in parenthesis.

b,  $R_{\text{merge}} = \frac{\sum_{hkl} \sum_j |I_j(hkl) - \langle I(hkl) \rangle|}{\sum_{hkl} \langle I(hkl) \rangle}$ , statistics for merging all observations for given reflections.

c,  $R = \frac{\sum_{hkl} |F_{\text{obs}}(hkl) - F_{\text{calc}}(hkl)|}{\sum_{hkl} F_{\text{obs}}(hkl)}$ , statistics for crystallographic agreement between the measured and model-calculated amplitudes. R<sub>free</sub> is the agreement for cross-validation data set.

e, Root mean squares deviations (rmsd) to ideal values.

Table S2. Crystallographic Statistics for Data Collection and Structure Refinement of dNTP/dG-Containing Ternary Complexes of qm RB69pol.

|                                 | dATP/dG                                       | dGTP/dG                                       | dCTP/dG                                       | dTTP/dG                                       |
|---------------------------------|-----------------------------------------------|-----------------------------------------------|-----------------------------------------------|-----------------------------------------------|
| <b>Space group</b>              | P2 <sub>1</sub> 2 <sub>1</sub> 2 <sub>1</sub> |
| Unit cell<br>(a,b,c (Å))        | 75.0,119.9,130.5                              | 74.8, 120.4,130.7                             | 74.9,120.2,130.6                              | 75.0,120.3,130.3                              |
| Resolution (Å)                  | 50.0 - 2.12                                   | 50.0 - 1.90                                   | 50.0 - 2.18                                   | 50.0 - 2.00                                   |
| <b>No of unique reflections</b> | 67,112                                        | 90,886                                        | 61,410                                        | 80,229                                        |
| Redundancy                      | 3.2 (3.2)                                     | 3.6 (3.5)                                     | 3.5 (3.3)                                     | 3.2 (2.6)                                     |
| Completeness (%)                | 97.4 (94.8)                                   | 95.9 (96.2)                                   | 98.6 (97.1)                                   | 98.0 (88.6)                                   |
| R <sub>merge</sub> (%)          | 6.8 (29.2)                                    | 7.3 (86.5)                                    | 8.9 (72.8)                                    | 9.0 (63.7)                                    |
| I / σ                           | 15.3 (4.1)                                    | 16.9 (1.1)                                    | 12.4 (1.8)                                    | 11.9 (1.1)                                    |
| <b>Final model</b>              |                                               |                                               |                                               |                                               |
| Amino acid residues             | 903                                           | 903                                           | 903                                           | 903                                           |
| Water molecules                 | 593                                           | 624                                           | 364                                           | 608                                           |
| Ca <sup>2+</sup> ions           | 5                                             | 5                                             | 6                                             | 5                                             |
| Template nucleotides            | 18                                            | 18                                            | 18                                            | 18                                            |
| Primer nucleotides              | 13                                            | 13                                            | 13                                            | 13                                            |
| dNTP                            | 1                                             | 1                                             | 1                                             | 1                                             |
| <b>Refinement Statistics</b>    |                                               |                                               |                                               |                                               |
| Reflections                     | 63,686                                        | 86,052                                        | 58,032                                        | 75,930                                        |
| R (%)                           | 18.3 (20.9)                                   | 18.7 (28.0)                                   | 20.3 (32.7)                                   | 18.6 (28.9)                                   |
| R <sub>free</sub> (%)           | 22.5 (25.0)                                   | 22.2 (30.7)                                   | 25.6 (38.5)                                   | 22.5 (35.0)                                   |
| r.m.s.d                         |                                               |                                               |                                               |                                               |
| Bond length (Å)                 | 0.006                                         | 0.009                                         | 0.009                                         | 0.008                                         |
| Bond angles (°)                 | 1.062                                         | 1.124                                         | 1.178                                         | 1.097                                         |
| PDB code                        | 4FJX                                          | 4FK4                                          | 4FK0                                          | 4FK2                                          |

Footnotes:

a, Statistics for the highest resolution shell are in parenthesis.

b,  $R_{\text{merge}} = \frac{\sum_{hkl} \sum_j |I_j(hkl) - \langle I(hkl) \rangle|}{\sum_{hkl} \langle I(hkl) \rangle}$ , statistics for merging all observations for given reflections.

c,  $R = \frac{\sum_{hkl} |F_{\text{obs}}(hkl) - F_{\text{calc}}(hkl)|}{\sum_{hkl} F_{\text{obs}}(hkl)}$ , statistics for crystallographic agreement between the measured and model-calculated amplitudes. R<sub>free</sub> is the agreement for cross-validation data set.

e, Root mean squares deviations (rmsd) to ideal values.

Table S3. Crystallographic Statistics for Data Collection and Structure Refinement of dNTP/dC-Containing Ternary Complexes of qm RB69pol.

|                                 | dATP/dC                                       | dGTP/dC                                       | dCTP/dC                                       | dTTP/dC                                       |
|---------------------------------|-----------------------------------------------|-----------------------------------------------|-----------------------------------------------|-----------------------------------------------|
| <b>Space group</b>              | P2 <sub>1</sub> 2 <sub>1</sub> 2 <sub>1</sub> |
| Unit cell (a,b,c (Å))           | 75.1,119.9,130.6                              | 75.0, 120.1,130.6                             | 78.3,119.6,130.2                              | 75.2,119.8,130.6                              |
| Resolution (Å)                  | 50.0 - 2.02                                   | 50.0 - 2.11                                   | 50.0 - 2.20                                   | 50.0 - 2.00                                   |
| <b>No of unique reflections</b> | 72,855                                        | 68,358                                        | 59,242                                        | 80,794                                        |
| Redundancy                      | 3.0 (2.6)                                     | 3.6 (3.5)                                     | 3.0 (2.2)                                     | 3.1 (3.1)                                     |
| Completeness (%)                | 94.6 (94.6)                                   | 98.8 (96.4)                                   | 94.8 (80.7)                                   | 99.1 (99.4)                                   |
| R <sub>merge</sub> (%)          | 12.4 (71.8)                                   | 6.1 (27.9)                                    | 13.3 (63.9)                                   | 11.0 (68.7)                                   |
| I / σ                           | 8.3 (1.0)                                     | 19.9 (3.8)                                    | 8.0 (1.1)                                     | 11.1 (1.5)                                    |
| <b>Final model</b>              |                                               |                                               |                                               |                                               |
| Amino acid residues             | 903                                           | 903                                           | 903                                           | 903                                           |
| Water molecules                 | 384                                           | 734                                           | 164                                           | 574                                           |
| Ca <sup>2+</sup> ions           | 5                                             | 5                                             | 5                                             | 5                                             |
| Template nucleotides            | 18                                            | 18                                            | 18                                            | 18                                            |
| Primer nucleotides              | 13                                            | 13                                            | 13                                            | 13                                            |
| dNTP                            | 1                                             | 1                                             | 1                                             | 1                                             |
| <b>Refinement Statistics</b>    |                                               |                                               |                                               |                                               |
| Reflections                     | 68,757                                        | 64,834                                        | 55,752                                        | 76,430                                        |
| R (%)                           | 22.0 (30.1)                                   | 17.5 (19.4)                                   | 21.0 (26.3)                                   | 18.6 (24.3)                                   |
| R <sub>free</sub> (%)           | 25.9 (34.3)                                   | 22.2 (24.3)                                   | 26.4 (32.2)                                   | 22.5 (26.6)                                   |
| r.m.s.d                         |                                               |                                               |                                               |                                               |
| Bond length (Å)                 | 0.009                                         | 0.006                                         | 0.011                                         | 0.008                                         |
| Bond angles (°)                 | 1.155                                         | 1.067                                         | 1.345                                         | 1.094                                         |
| PDB code                        | 4FJG                                          | 4FJH                                          | 4FJI                                          | 4FJJ                                          |

Footnotes:

a, Statistics for the highest resolution shell are in parenthesis.

b,  $R_{merge} = \sum_{hkl} \sum_j |I_j(hkl) - \langle I(hkl) \rangle| / \sum_{hkl} \langle I(hkl) \rangle$ , statistics for merging all observations for given reflections.

c,  $R = \sum_{hkl} |F_{obs}(hkl) - F_{calc}(hkl)| / \sum_{hkl} F_{obs}(hkl)$ , statistics for crystallographic agreement between the measured and model-calculated amplitudes. R<sub>free</sub> is the agreement for cross-validation data set.

e, Root mean squares deviations (rmsd) to ideal values.

Table S4. Crystallographic Statistics for Data Collection and Structure Refinement of dNTP/dA-Containing Ternary Complexes of RB69pol quadruple mutant

|                                 | dATP/dA                                       | dGTP/dA                                       | dCTP/dA                                       | dTTP/dA                                       |
|---------------------------------|-----------------------------------------------|-----------------------------------------------|-----------------------------------------------|-----------------------------------------------|
| <b>Space group</b>              | P2 <sub>1</sub> 2 <sub>1</sub> 2 <sub>1</sub> |
| Unit cell (a,b,c (Å))           | 74.7,120.2,130.6                              | 74.9,120.5,130.8                              | 75.2,119.7,130.3                              | 75.0,120.5,130.8                              |
| Resolution (Å)                  | 50.0 - 2.00                                   | 50.0 - 1.87                                   | 50.0 - 2.02                                   | 50.0 - 2.00                                   |
| <b>No of unique reflections</b> | 79,818                                        | 97,730                                        | 76,737                                        | 81,721                                        |
| Redundancy                      | 3.2 (3.2)                                     | 3.5 (3.4)                                     | 3.1 (3.0)                                     | 3.6 (3.6)                                     |
| Completeness (%)                | 99.5 (100.0)                                  | 99.2 (96.1)                                   | 98.5 (98.6)                                   | 99.6 (99.9)                                   |
| R <sub>merge</sub> (%)          | 8.2 (81.7)                                    | 6.2 (72.0)                                    | 9.5 (74.7)                                    | 7.6 (94.8)                                    |
| I / σ                           | 11.6 (1.1)                                    | 17.0 (1.3)                                    | 12.2 (1.1)                                    | 14.8 (1.1)                                    |
| <b>Final model</b>              |                                               |                                               |                                               |                                               |
| Amino acid residues             | 903                                           | 903                                           | 903                                           | 903                                           |
| Water molecules                 | 616                                           | 814                                           | 464                                           | 411                                           |
| Ca <sup>2+</sup> ions           | 5                                             | 5                                             | 5                                             | 5                                             |
| Template nucleotides            | 18                                            | 18                                            | 18                                            | 18                                            |
| Primer nucleotides              | 13                                            | 13                                            | 13                                            | 13                                            |
| dNTP                            | 1                                             | 1                                             | 1                                             | 1                                             |
| <b>Refinement Statistics</b>    |                                               |                                               |                                               |                                               |
| Reflections                     | 75,753                                        | 92,786                                        | 72,632                                        | 77,371                                        |
| R (%)                           | 18.2 (24.8)                                   | 17.9 (28.2)                                   | 19.1 (26.6)                                   | 19.9 (28.9)                                   |
| R <sub>free</sub> (%)           | 22.5 (30.2)                                   | 22.2 (33.6)                                   | 23.4 (31.7)                                   | 24.1 (31.2)                                   |
| r.m.s.d                         |                                               |                                               |                                               |                                               |
| Bond length (Å)                 | 0.008                                         | 0.007                                         | 0.008                                         | 0.009                                         |
| Bond angles (°)                 | 1.247                                         | 1.180                                         | 1.130                                         | 1.133                                         |
| PDB code                        | 4FJK                                          | 4FJL                                          | 4FJM                                          | 4FJN                                          |

Footnotes:

a, Statistics for the highest resolution shell are in parenthesis.

b,  $R_{\text{merge}} = \frac{\sum_{hkl} \sum_j |I_j(hkl) - \langle I(hkl) \rangle|}{\sum_{hkl} \langle I(hkl) \rangle}$ , statistics for merging all observations for given reflections.

c,  $R = \frac{\sum_{hkl} |F_{\text{obs}}(hkl) - F_{\text{calc}}(hkl)|}{\sum_{hkl} F_{\text{obs}}(hkl)}$ , statistics for crystallographic agreement between the measured and model-calculated amplitudes. R<sub>free</sub> is the agreement for cross-validation data set.

e, Root mean squares deviations (rmsd) to ideal values.

Table S5. B factors for incoming dNTP, the nucleotides at position n and n-1 of template strand in wt and qm RB69 pol structures.

| Base Pairs      | dNTP/dN | dNTP  | dN (n) | dN (n+1) | Overall |
|-----------------|---------|-------|--------|----------|---------|
| Correct BP (qm) | dATP/dT | 10.68 | 15.68  | 43.65    | 24.82   |
|                 | dTTP/dA | 30.64 | 14.27  | 54.93    | 28.75   |
|                 | dGTP/dC | 14.03 | 20.30  | 35.80    | 23.09   |
|                 | dCTP/dG | 15.73 | 16.18  | 45.95    | 28.29   |
| Pyr-Pyr (qm)    | dCTP/dC | 17.25 | 33.16  | 66.94    | 23.95   |
|                 | dCTP/dT | 11.85 | 16.62  | 32.07    | 25.60   |
|                 | dTTP/dC | 19.17 | 16.30  | 26.47    | 22.27   |
|                 | dTTP/dT | 23.31 | 20.39  | 31.51    | 26.69   |
| Pur-Pyr (qm)    | dATP/dC | 11.90 | 18.20  | 27.98    | 19.96   |
|                 | dCTP/dA | 15.30 | 18.59  | 31.71    | 25.58   |
|                 | dGTP/dT | 11.45 | 15.90  | 30.22    | 24.27   |
|                 | dTTP/dG | 20.00 | 9.64   | 31.23    | 23.21   |
| Pur-Pur (qm)    | dATP/dA | 12.22 | 64.75  | 73.69    | 25.14   |
|                 | dATP/dG | 18.01 | 69.88  | 51.11    | 31.94   |
|                 | dGTP/dA | 12.10 | 48.05  | 67.47    | 25.68   |
|                 | dGTP/dG | 14.35 | 55.04  | 50.52    | 25.36   |
| Correct BP (wt) | dCTP/dG | 17.54 | 15.36  | 29.53    | 26.13   |

Figure S1.

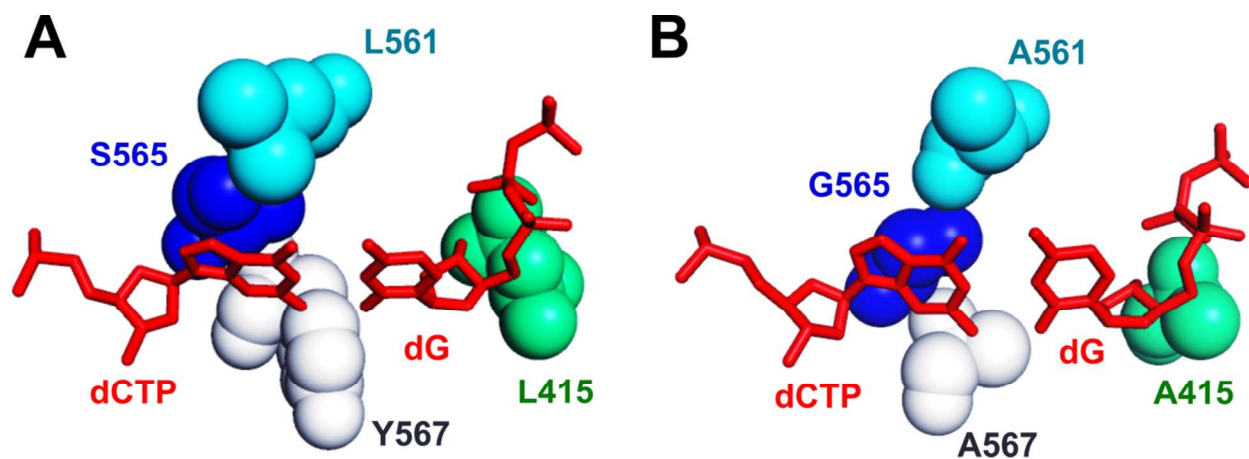

Figure S2.

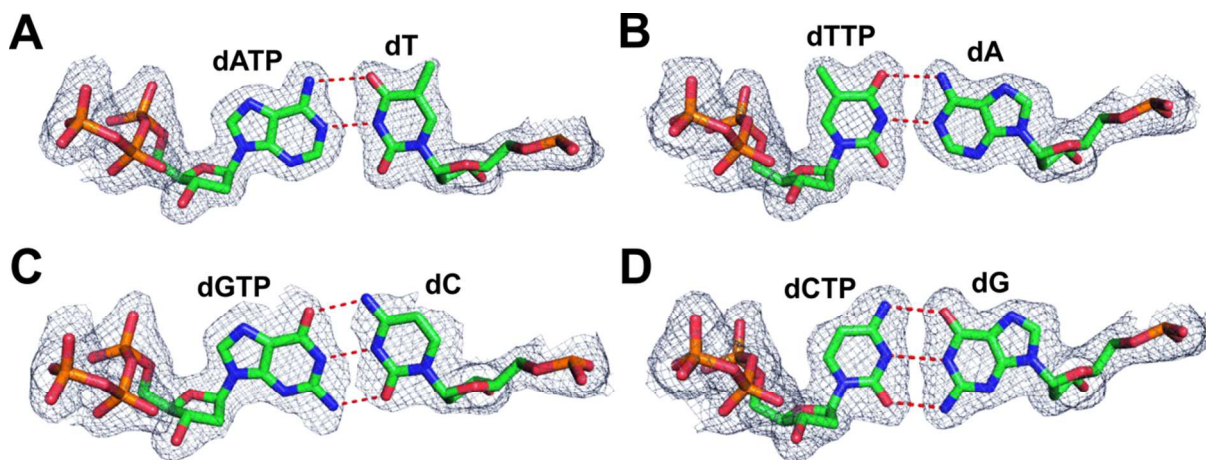

Figure S3.

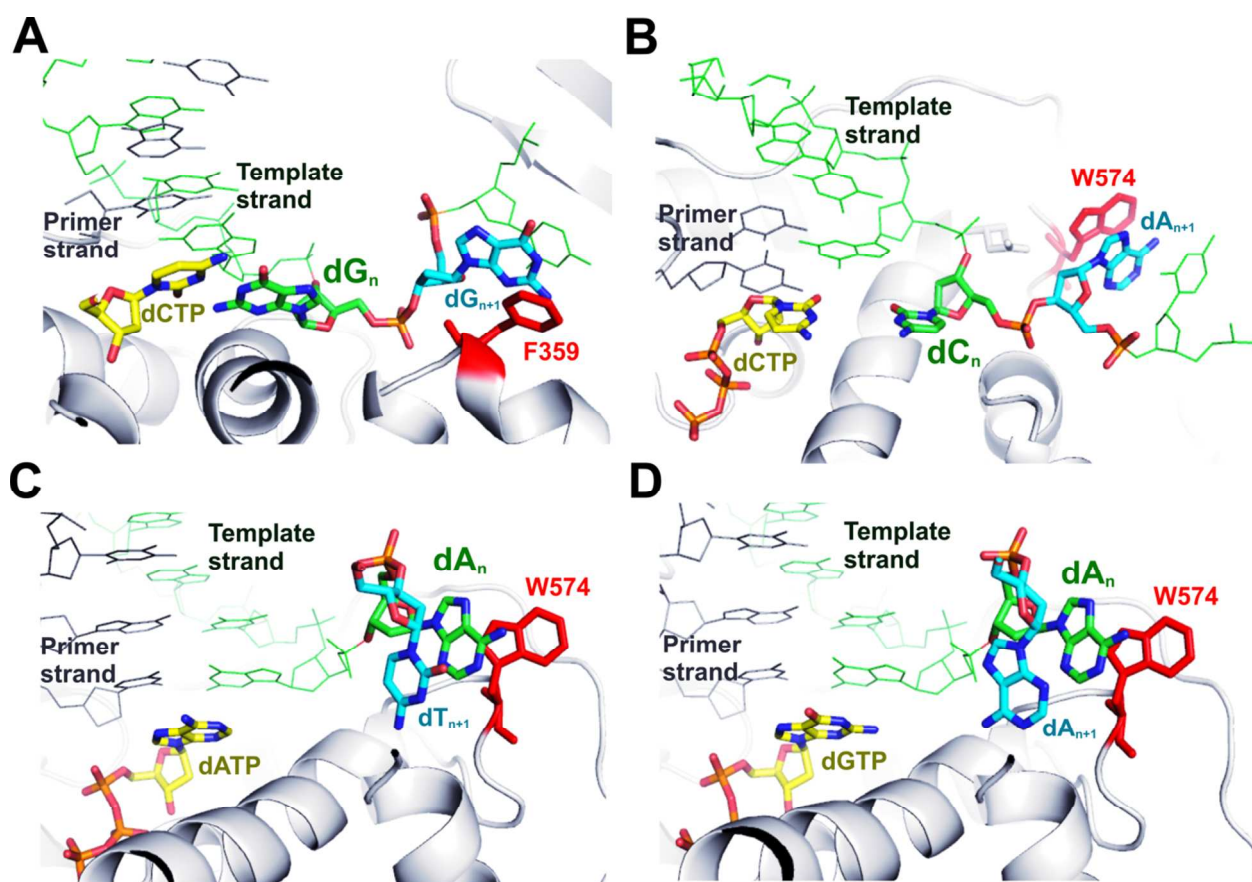



Figure S4.

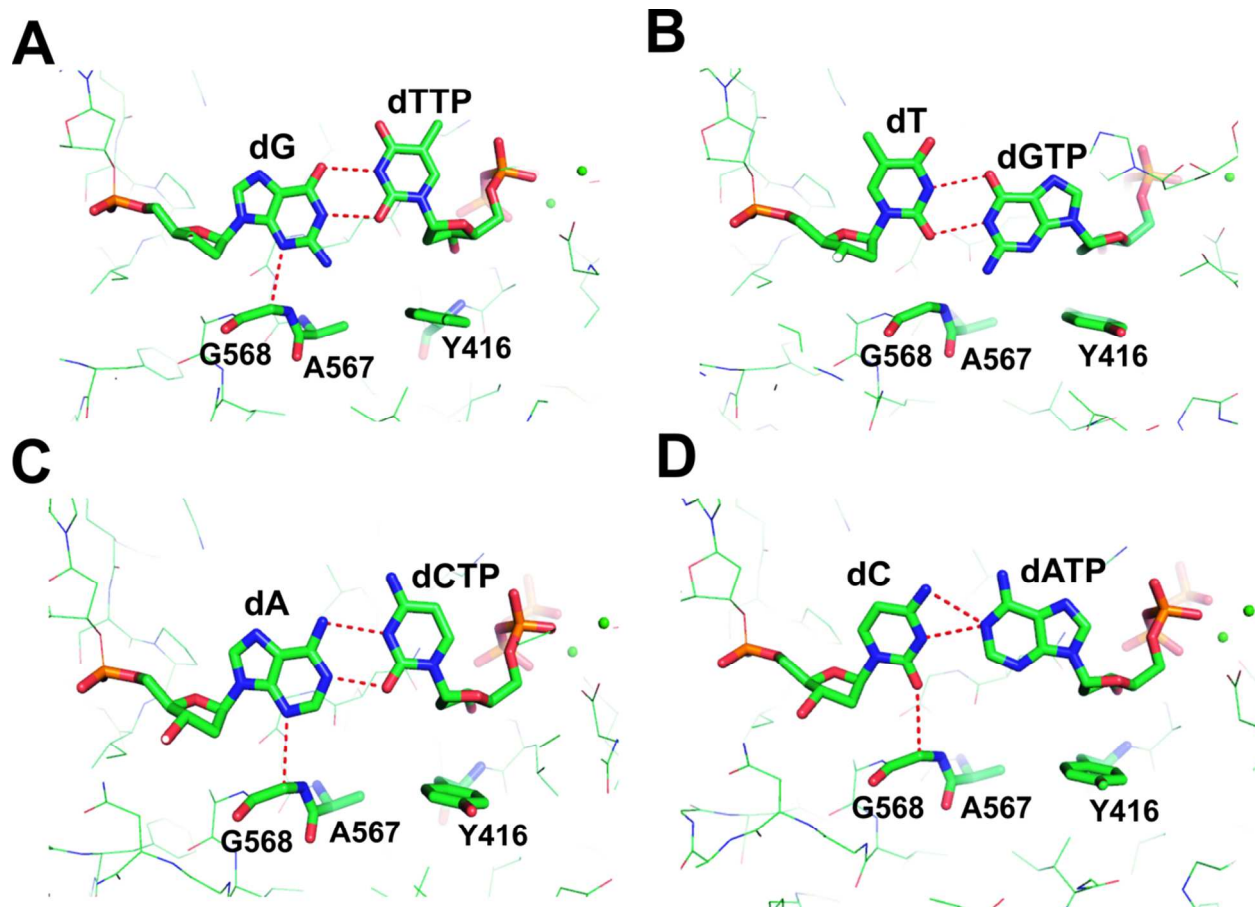

Figure S5.

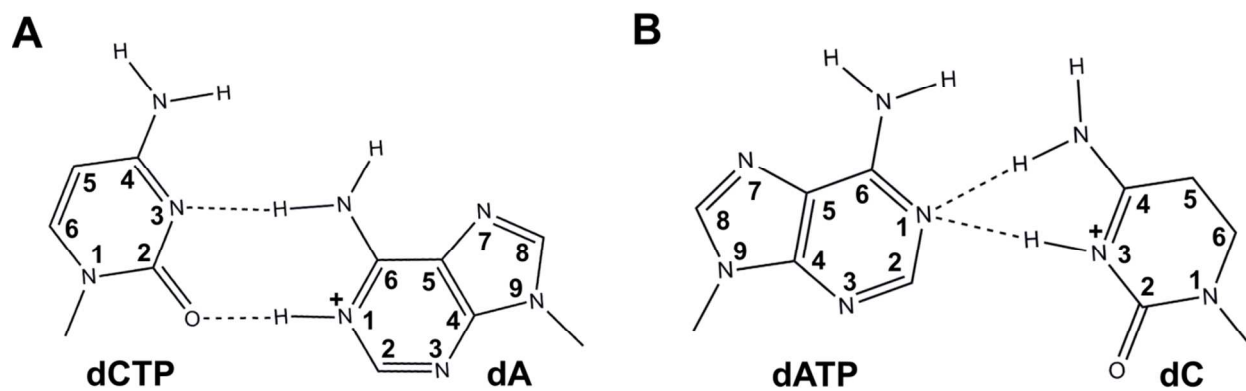

Figure S6.

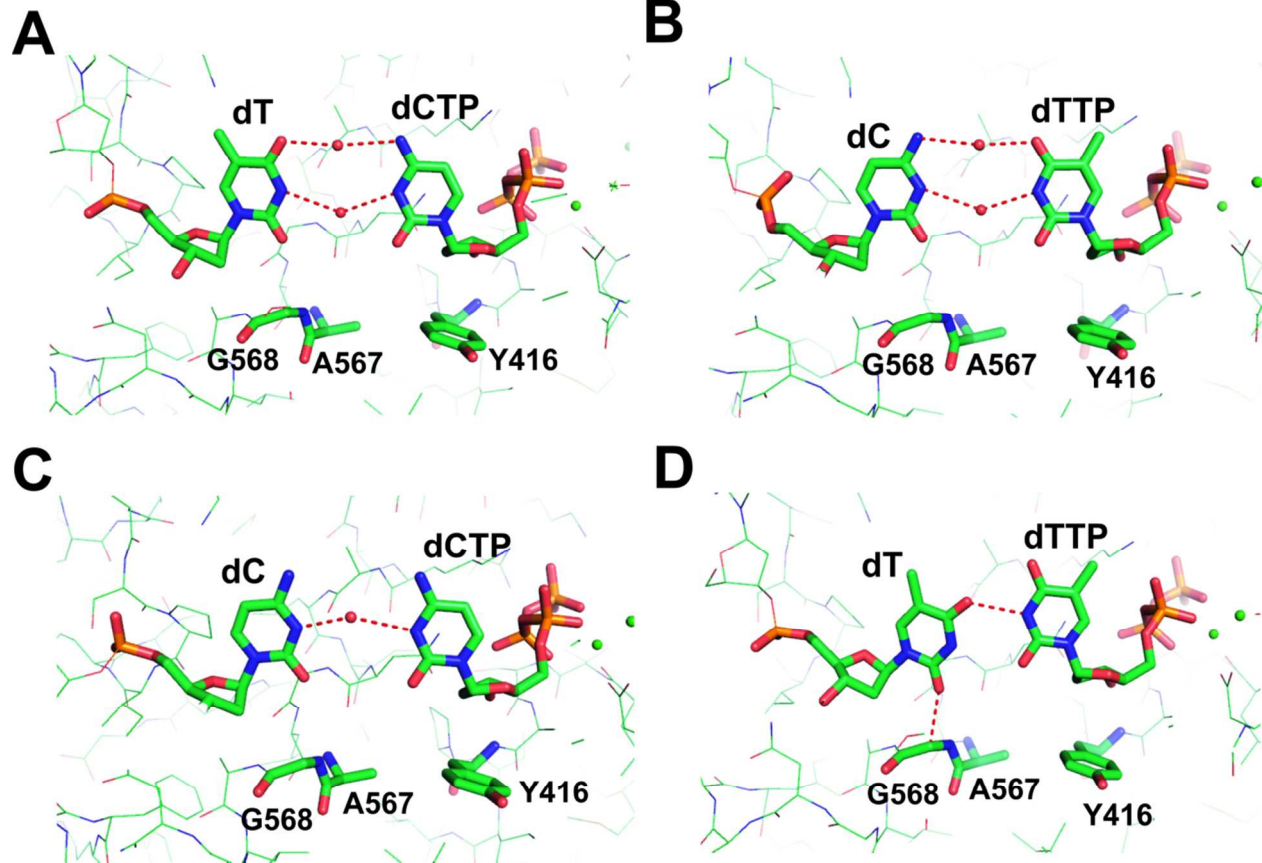

Figure S7.

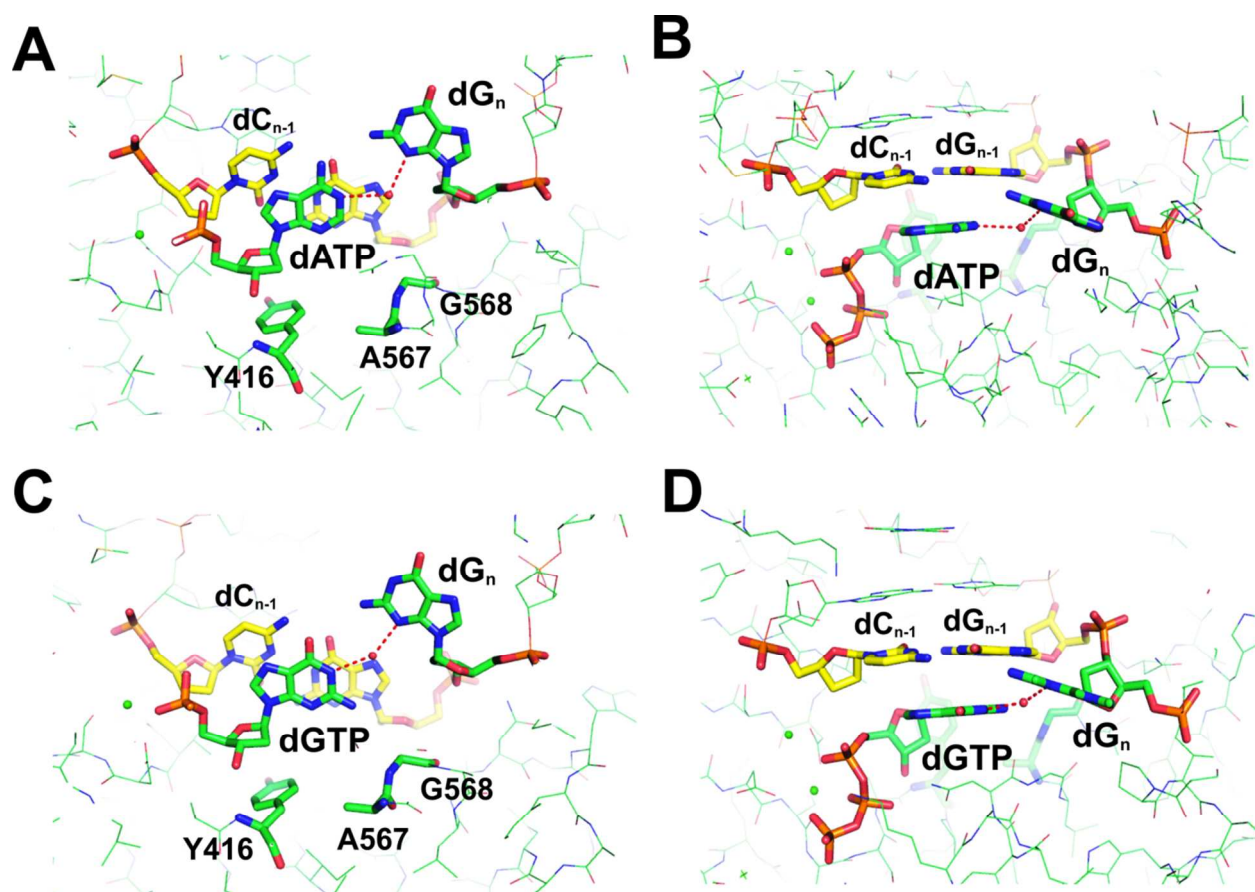

Figure S8.

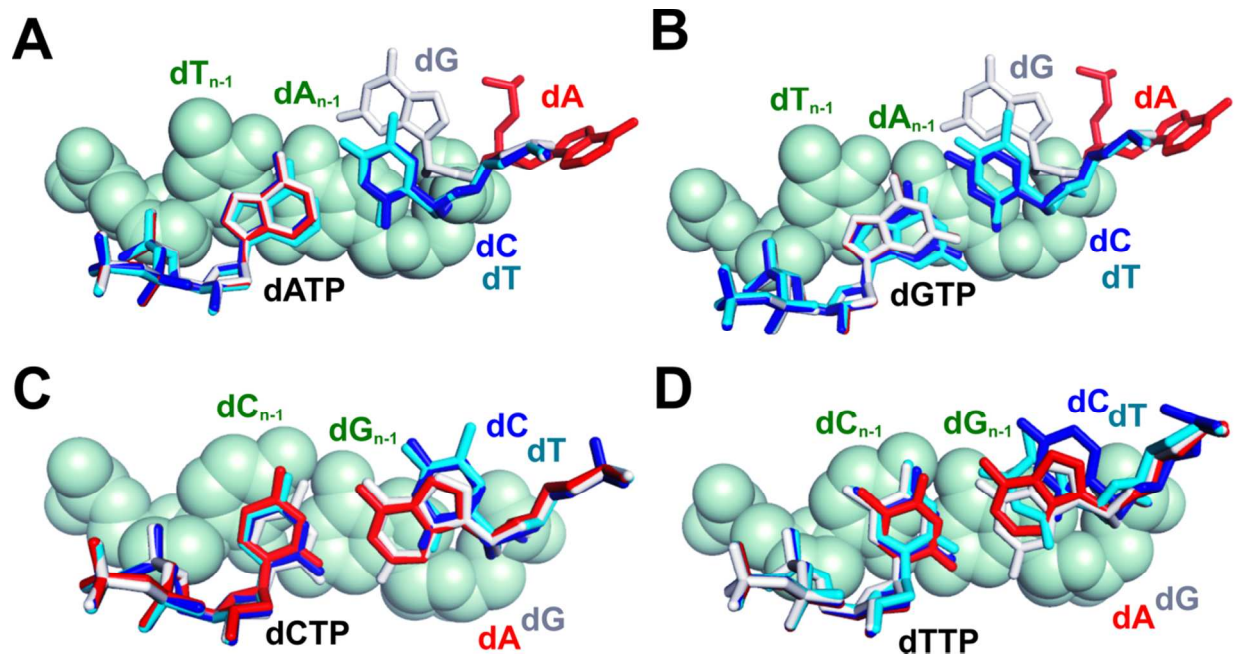

Figure S9.

|                                                              |                                                              |
|--------------------------------------------------------------|--------------------------------------------------------------|
| <b>dATP/dA:</b> 3'-GCGCCTGACGAATGACCT-5'<br>5'-GCGGACTGCTTAC | <b>dATP/dC:</b> 3'-GCGCCTGACGAATGCGCT-5'<br>5'-GCGGACTGCTTAC |
| <b>dATP/dG:</b> 3'-GCGCCTGACGAATGAGCT-5'<br>5'-GCGGACTGCTTAC | <b>dATP/dT:</b> 3'-GCGCCTGACGAATATGCT-5'<br>5'-GCGGACTGCTTAT |
| <b>dCTP/dA:</b> 3'-GCGCCTGACGAATGACCT-5'<br>5'-GCGGACTGCTTAC | <b>dCTP/dC:</b> 3'-GCGCCTGACGAATGCACT-5'<br>5'-GCGGACTGCTTAC |
| <b>dCTP/dG:</b> 3'-GCGCCTGACGAATGGCCT-5'<br>5'-GCGGACTGCTTAC | <b>dCTP/dT:</b> 3'-GCGCCTGACCAATATACT-5'<br>5'-GCGGACTGTTAT  |
| <b>dGTP/dA:</b> 3'-GCGCCTGACGAATGAACT-5'<br>5'-GCGGACTGCTTAC | <b>dGTP/dC:</b> 3'-GCGCCTGACGAATACGCT-5'<br>5'-GCGGACTGCTTAT |
| <b>dGTP/dG:</b> 3'-GCGCCTGACGAATGGACT-5'<br>5'-GCGGACTGCTTAC | <b>dGTP/dT:</b> 3'-GCGCCTGACGAATCTGCT-5'<br>5'-GCGGACTGCTTAG |
| <b>dTTP/dA:</b> 3'-GCGCCTGACGAATGACCT-5'<br>5'-GCGGACTGCTTAC | <b>dTTP/dC:</b> 3'-GCGCCTGACGAATGCGCT-5'<br>5'-GCGGACTGCTTAC |
| <b>dTTP/dG:</b> 3'-GCGCCTGACGAATGGTCT-5'<br>5'-GCGGACTGCTTAC | <b>dTTP/dT:</b> 3'-GCGCCTGACGAATCTGCT-5'<br>5'-GCGGACTGCTTAG |

Figure S10.

|                                                              |                                                              |
|--------------------------------------------------------------|--------------------------------------------------------------|
| <b>dATP/dA:</b> 3'-GCGCCTGACGAATGACCT-5'<br>5'-GCGGACTGCTTAC | <b>dATP/dC:</b> 3'-GCGCCTGACGAATGCGCT-5'<br>5'-GCGGACTGCTTAC |
| <b>dATP/dG:</b> 3'-GCGCCTGACGAATGGACT-5'<br>5'-GCGGACTGCTTAC | <b>dATP/dT:</b> 3'-GCGCCTGACGAATATGCT-5'<br>5'-GCGGACTGCTTAT |
| <b>dCTP/dA:</b> 3'-GCGCCTGACGAATGAGCT-5'<br>5'-GCGGACTGCTTAC | <b>dCTP/dC:</b> 3'-GCGCCTGACGAATGCACT-5'<br>5'-GCGGACTGCTTAC |
| <b>dCTP/dG:</b> 3'-GCGCCTGACGAATGGGCT-5'<br>5'-GCGGACTGCTTAC | <b>dCTP/dT:</b> 3'-GCGCCTGACTAATGTGCT-5'<br>5'-GCGGACTGGTTAC |
| <b>dGTP/dA:</b> 3'-GCGCCTGACGAATGAACT-5'<br>5'-GCGGACTGCTTAC | <b>dGTP/dC:</b> 3'-GCGCCTGACGAATACGCT-5'<br>5'-GCGGACTGCTTAT |
| <b>dGTP/dG:</b> 3'-GCGCCTGACGAATGGACT-5'<br>5'-GCGGACTGCTTAC | <b>dGTP/dT:</b> 3'-GCGCCTGACGAATCTGCT-5'<br>5'-GCGGACTGCTTAG |
| <b>dTTP/dA:</b> 3'-GCGCCTGACGAATGAACT-5'<br>5'-GCGGACTGCTTAC | <b>dTTP/dC:</b> 3'-GCGCCTGACGAATGCGCT-5'<br>5'-GCGGACTGCTTAC |
| <b>dTTP/dG:</b> 3'-GCGCCTGACGAATGGACT-5'<br>5'-GCGGACTGCTTAC | <b>dTTP/dT:</b> 3'-GCGCCTGACGAATCTGCT-5'<br>5'-GCGGACTGCTTAG |

## Figure legends

Figure S1. NBP of (A) wt and (B) qm RB69pol. dCTP/dG is shown in red stick and protein side chains are shown in space-filling mode. L415/A415 is shown in green, L561/A561 is shown in cyan, S565/G565 is shown in blue and Y567/A567 is shown in white.

Figure S2. Final 2Fo-Fc electron density map for four correct base-pairs at the NBP of qm RB69pol contoured at 1.2  $\sigma$ : (A) dATP/dT; (B) dTTP/dA; (C) dGTP/dC and (D) dC/dGTP.

Figure S3. Alternative conformations of the 5'-overhang of template strand DNA in the ternary complex of (A) dCTP/dG-containing qm RB69pol; (B) dCTP/dC-containing qm RB69pol; (C) dATP/dA-containing qm RB69pol and (D) dGTP/dA-containing qm RB69pol.

Figure S4. NBP of qm RB69pol with Pu-Py mismatches. (A) dTTP/dG; (B) dGTP/dT; (C) dCTP/dA and (D) dATP/dC.

Figure S5. Protonation state of (A) dCTP/dA and (B) dATP/dC observed in the structures.

Figure S6. NBP of qm RB69pol with Py-Py mismatches. (A) dCTP/dT; (B) dTTP/dC; (C) dCTP/dC and (D) dTTP/dT.

Figure S7. NBP of qm RB69pol with Pu-Pu mismatches. (A) dATP/dG; (B) orthogonal view of A; (C) dGTP/dG and (D) orthogonal view of C.

Figure S8. Base stacking of the incoming dNTP and templating base with the penultimate base-pair. (A) dATP/dN; (B) dGTP/dN; (C) dCTP/dN and (D) dTTP/dN.

Figure S9. P/T sequences used for chemical quench experiments.

Figure S10. P/T sequences used for crystallization (the primer is dideoxy-terminated).
